# Supplementary material for: Sonochemical synthesis of ZnCo2O4/Ag3PO4 heterojunction photocatalysts for the degradation of organic pollutants and pathogens: a combined experimental and computational study
Source: Royal Society of Chemistry journal article supplement (doi:10.1039/d2nj01352e), 2022-01-01

## Supporting Information for

**Sonochemical Synthesis of ZnCo<sub>2</sub>O<sub>4</sub>/Ag<sub>3</sub>PO<sub>4</sub> Heterojunction Photocatalysts for the degradation of organic pollutants and pathogens: an experimental and computational study**

**Muhammad Nawaz<sup>a\*</sup>, Mohammad Azam Ansari<sup>b</sup>, Alejandro Pérez Paz<sup>c\*</sup>, Soleiman Hisaindee<sup>c</sup>, Faiza Qureshi<sup>d,a</sup>, Anwar Ul-Hamid<sup>e</sup>, Abbas Saeed Hakeem<sup>f</sup>, Muhammad Taha<sup>g</sup>,**

*<sup>a</sup>Department of Nano-Medicine Research, Institute for Research and Medical Consultations (IRMC), Imam Abdulrahman Bin Faisal University, P.O. Box 1982, Dammam 31441, Saudi Arabia*

*<sup>b</sup>Department of Epidemic Disease Research, Institutes for Research and Medical Consultations (IRMC), Imam Abdulrahman Bin Faisal University, P.O. Box 1982, Dammam 31441, Saudi Arabia*

*<sup>c</sup>Chemistry Department, College of Science, United Arab Emirates University, P.O. Box 15551 Al-Ain, UAE*

*<sup>d</sup>Deanship of Scientific Research, Imam Abdulrahman Bin Faisal University, P.O. Box 1982, Dammam 31441, Saudi Arabia*

*<sup>e</sup>Center for Engineering Research, Research Institute, King Fahd University of Petroleum & Minerals, Dhahran 31261, Saudi Arabia*

*<sup>f</sup>Center of Excellence in Nanotechnology, King Fahd University of Petroleum & Minerals, Dhahran 31261, Saudi Arabia*

*<sup>g</sup>Department of Clinical Pharmacy, Institute for Research and Medical Consultations (IRMC), Imam Abdulrahman Bin Faisal University, P.O. Box 1982, Dammam 31441, Saudi Arabia*

**Fig. S0:** Simulated powder XRD spectra using the VESTA software [K. Momma and F. Izumi, Commission on Crystallogr. Comput., IUCr Newslett., 7, 106-119 (2006)] of the crystal structures (Cartesian coordinates provided below) used in our *ab initio* calculations. Excellent agreement with our experimental XRD patterns (Top of Fig. 1 of main text) is observed.

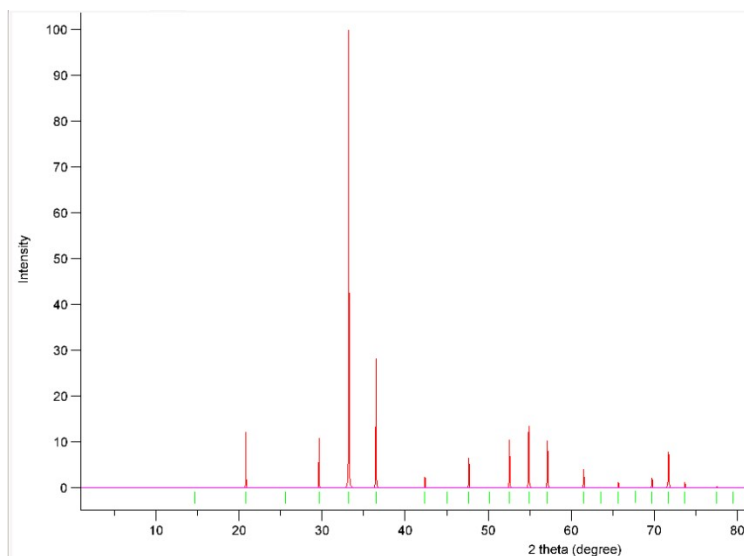

(a) XRD pattern for the experimental geometry of  $\text{Ag}_3\text{PO}_4$  crystal.

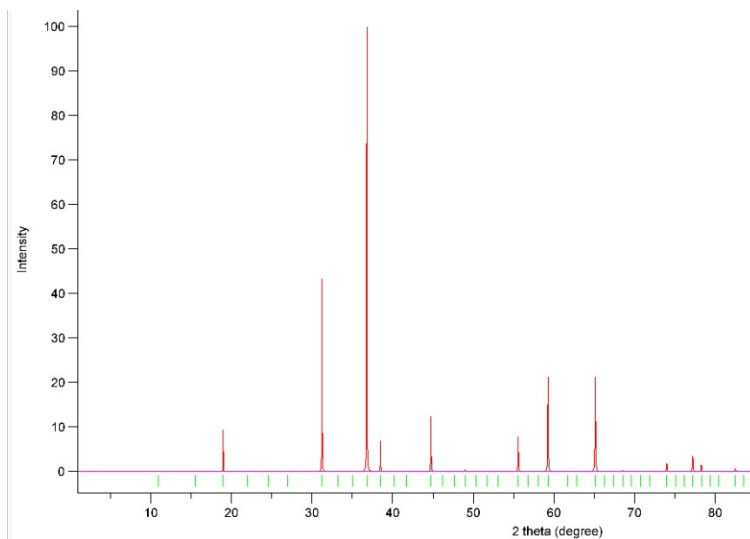

(b) XRD pattern for the relaxed structure of  $\text{ZnCo}_2\text{O}_4$  crystal.

**Fig. S1:** SEM image of ZnCo<sub>2</sub>O<sub>4</sub>/Ag<sub>3</sub>PO<sub>4</sub> nanoparticles

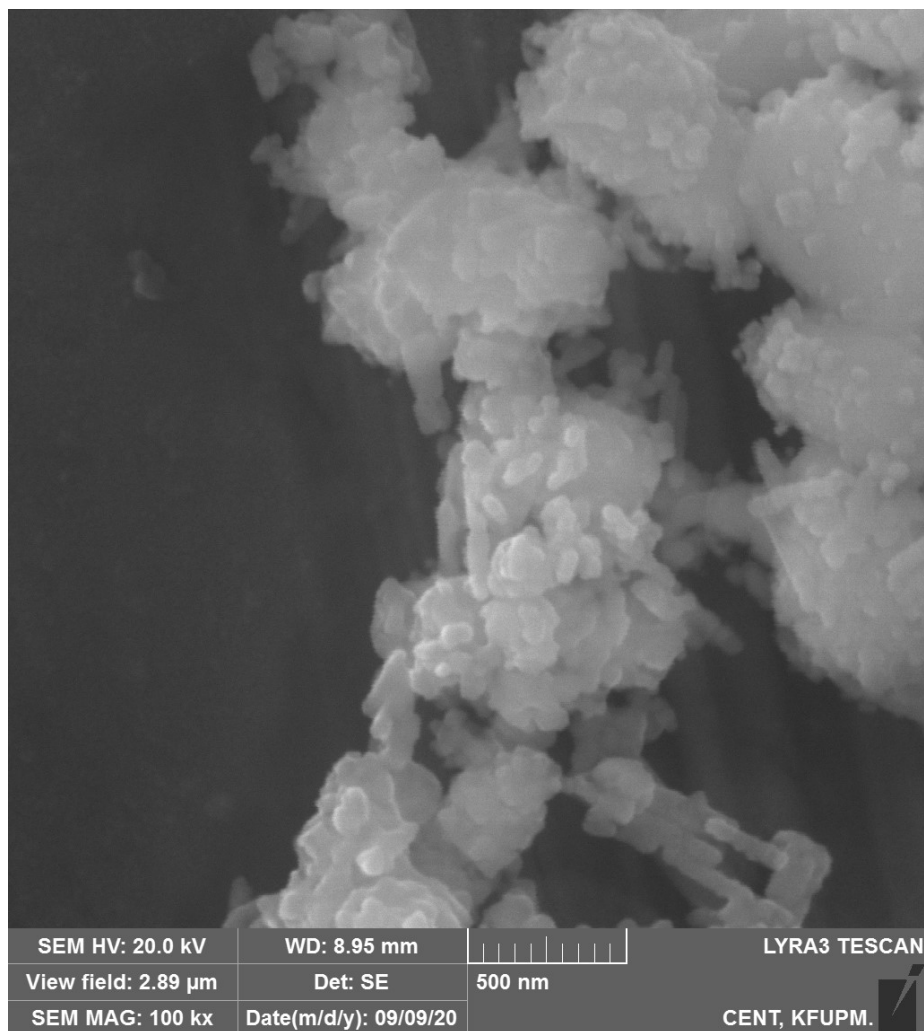

**Cartesian coordinates (in Å) for Ag<sub>3</sub>PO<sub>4</sub> in xyz format. The computational cell was cubic with a lattice constant of 6.026 Å (experimental value) and contains 6 Ag, 2 P, and 8 O atoms (2 formula units).**

16

```
Ag 0.00000000 3.01300000 1.50650000
Ag 0.00000000 3.01300000 4.51950000
Ag 1.50650000 0.00000000 3.01300000
Ag 4.51950000 0.00000000 3.01300000
Ag 3.01300000 1.50650000 0.00000000
Ag 3.01300000 4.51950000 0.00000000
P 0.00000000 0.00000000 0.00000000
P 3.01300000 3.01300000 3.01300000
O 5.13402545 5.13402545 5.13402545
O 0.89197455 0.89197455 5.13402545
O 0.89197455 5.13402545 0.89197455
O 5.13402545 0.89197455 0.89197455
O 2.12102545 2.12102545 2.12102545
O 3.90497455 3.90497455 2.12102545
O 2.12102545 3.90497455 3.90497455
O 3.90497455 2.12102545 3.90497455
```

**Cartesian coordinates (in Å) for ZnCo<sub>2</sub>O<sub>4</sub> in xyz format. The computational cell was cubic with a lattice constant of 8.09462 Å (experimental value) and contains 8 Zn, 16 Co, and 32 O atoms (8 formula units).**

56

```
Zn 0.00000000 0.00000000 0.00000000
Zn 0.00000000 4.04731000 4.04731000
Zn 4.04731000 4.04731000 0.00000000
Zn 4.04731000 0.00000000 4.04731000
Zn 6.07096500 2.02365500 6.07096500
Zn 2.02365500 2.02365500 2.02365500
Zn 2.02365500 6.07096500 6.07096500
Zn 6.07096500 6.07096500 2.02365500
Co 5.05913750 5.05913750 5.05913750
Co 3.03548250 7.08279250 1.01182750
Co 7.08279250 1.01182750 3.03548250
Co 1.01182750 3.03548250 7.08279250
Co 7.08279250 3.03548250 1.01182750
Co 3.03548250 1.01182750 7.08279250
Co 1.01182750 7.08279250 3.03548250
Co 5.05913750 1.01182750 1.01182750
Co 3.03548250 3.03548250 5.05913750
Co 7.08279250 5.05913750 7.08279250
Co 7.08279250 7.08279250 5.05913750
Co 3.03548250 5.05913750 3.03548250
Co 1.01182750 5.05913750 1.01182750
Co 5.05913750 3.03548250 3.03548250
Co 5.05913750 7.08279250 7.08279250
Co 1.01182750 1.01182750 5.05913750
```

O 3.13261794 3.13261794 3.13261794  
O 4.96200206 0.91469206 7.17992794  
O 0.91469206 7.17992794 4.96200206  
O 7.17992794 4.96200206 0.91469206  
O 1.10896294 5.15627294 2.93834706  
O 6.98565706 6.98565706 6.98565706  
O 5.15627294 2.93834706 1.10896294  
O 2.93834706 1.10896294 5.15627294  
O 5.15627294 1.10896294 2.93834706  
O 1.10896294 2.93834706 5.15627294  
O 2.93834706 5.15627294 1.10896294  
O 0.91469206 4.96200206 7.17992794  
O 4.96200206 7.17992794 0.91469206  
O 7.17992794 0.91469206 4.96200206  
O 3.13261794 7.17992794 7.17992794  
O 4.96200206 4.96200206 3.13261794  
O 0.91469206 3.13261794 0.91469206  
O 1.10896294 1.10896294 6.98565706  
O 6.98565706 2.93834706 2.93834706  
O 5.15627294 6.98565706 5.15627294  
O 5.15627294 5.15627294 6.98565706  
O 1.10896294 6.98565706 1.10896294  
O 0.91469206 0.91469206 3.13261794  
O 4.96200206 3.13261794 4.96200206  
O 7.17992794 3.13261794 7.17992794  
O 3.13261794 4.96200206 4.96200206  
O 2.93834706 6.98565706 2.93834706  
O 6.98565706 1.10896294 1.10896294  
O 6.98565706 5.15627294 5.15627294  
O 3.13261794 0.91469206 0.91469206

O 7.17992794 7.17992794 3.13261794

O 2.93834706 2.93834706 6.98565706

**Fig. S2:** Calculated band structures. (a) The PBE band structure of  $\text{Ag}_3\text{PO}_4$  shows an indirect and direct band gap of 0.21 and 0.33 eV, respectively. (b) The PBE band structure of  $\text{ZnCo}_2\text{O}_4$  shows a direct band gap 0.93 eV at the Gamma point. (c)  $\text{Ag}_3\text{PO}_4$  crystal at the hybrid HSE06 level with a 1/4 fraction of exact exchange shows an underestimated band gap of 1.80 eV.

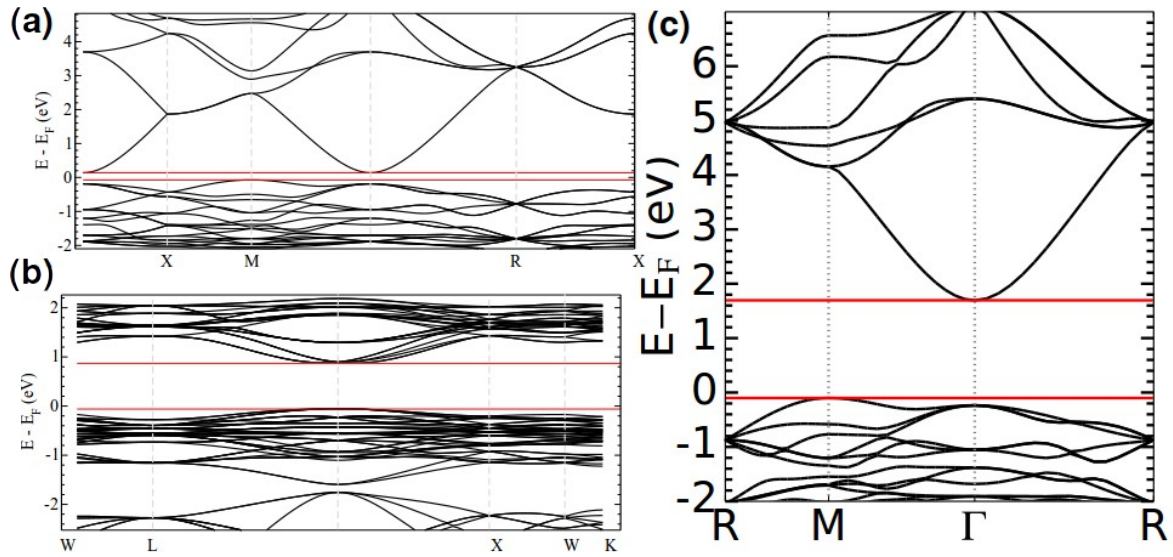

Supplement: d2nj01352e1.pdf [file d2nj01352e1.pdf]
